# Supplementary material
Source: publisher figshare collection journal article supplement (https://gsapubs.figshare.com/ndownloader/files/23293712)
Supplement: Supplementary file 1 [file 23293712]

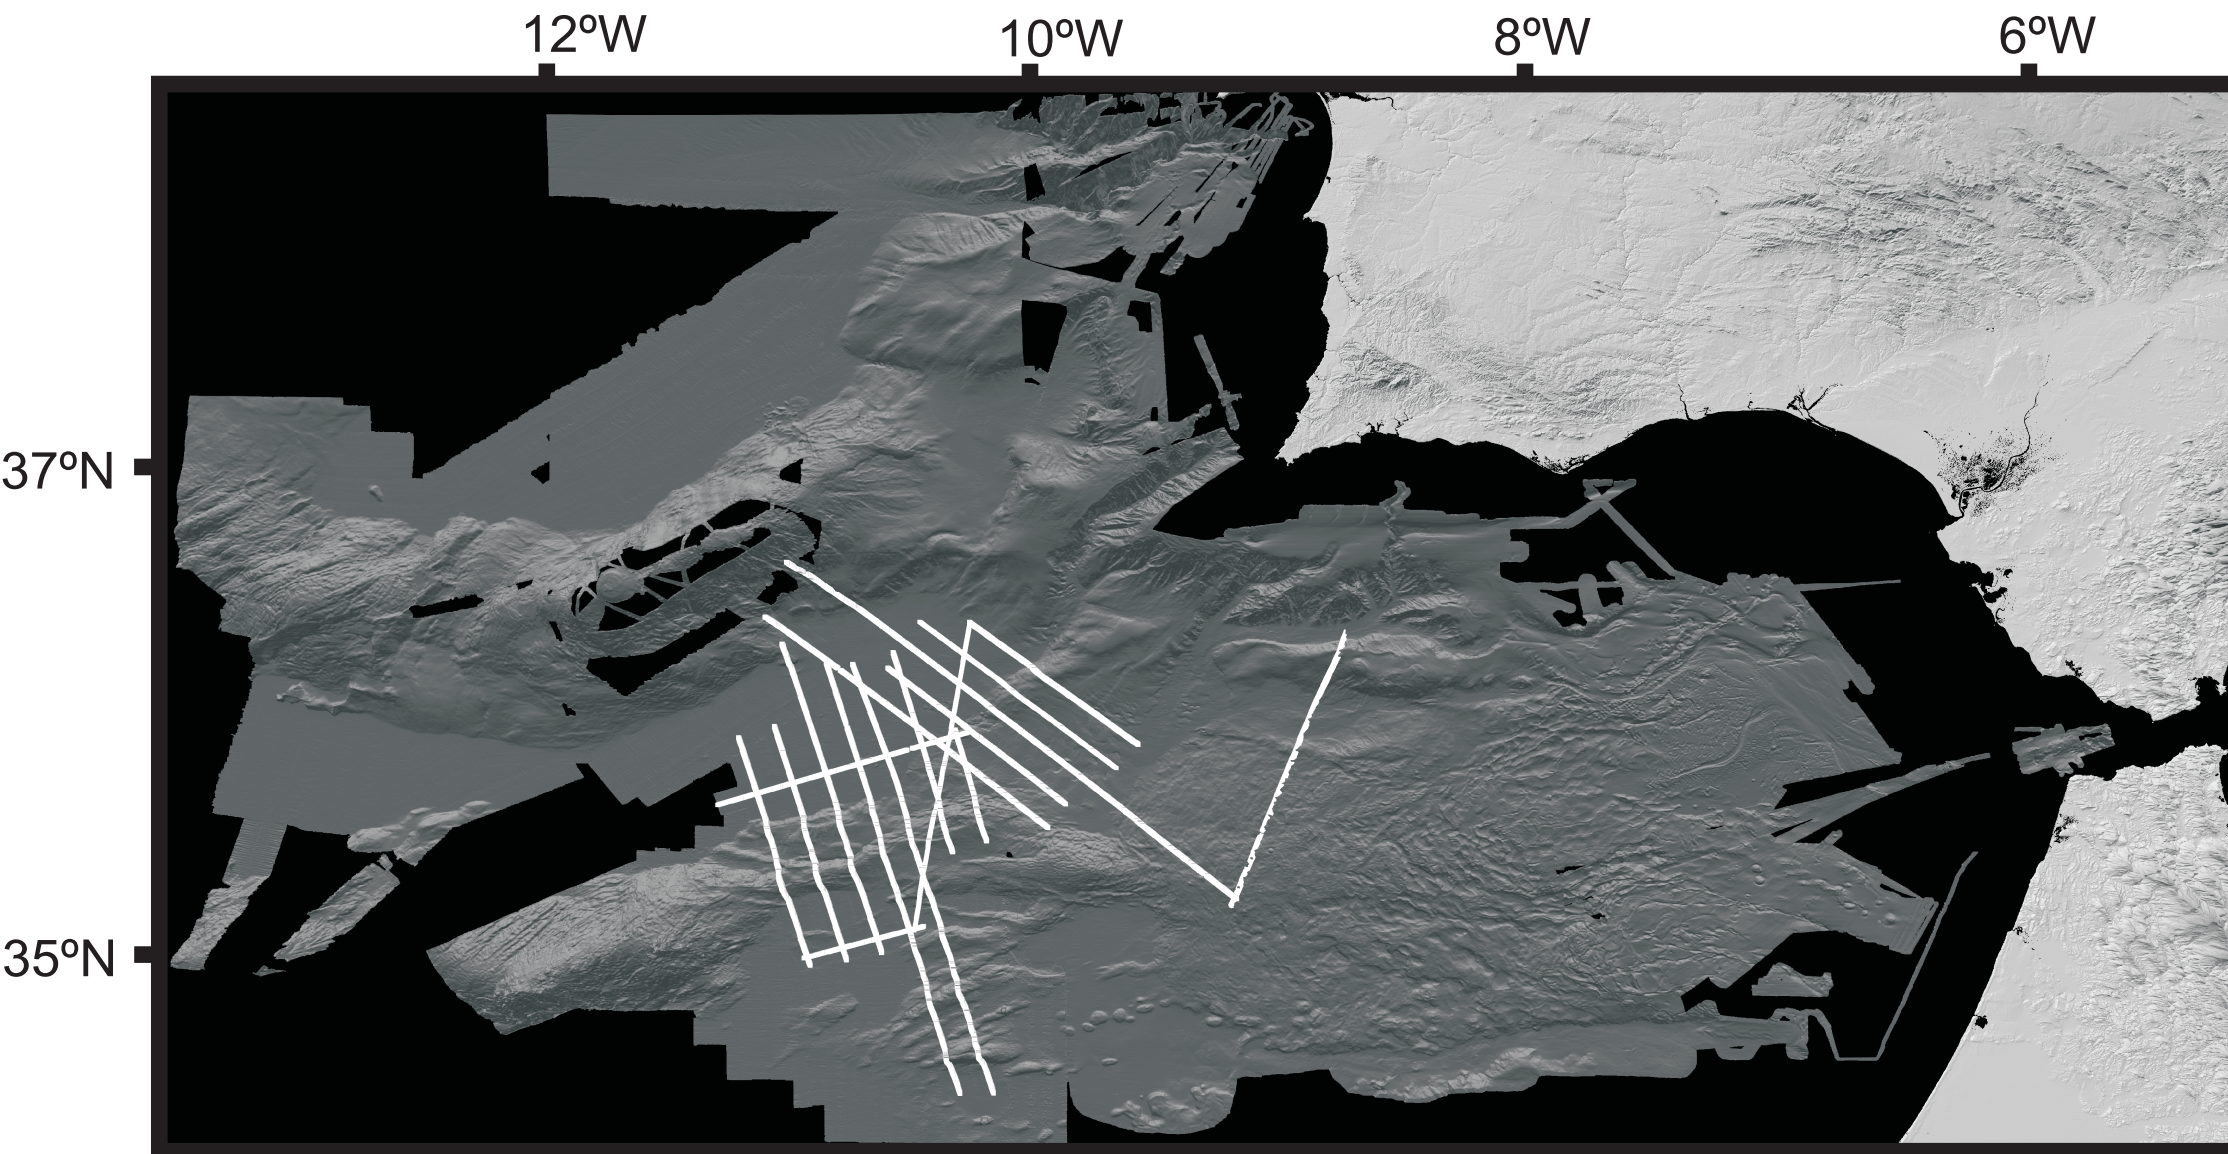

Figure DR1. Regional bathymetric map of the SW Iberian margin showing the seismic lines acquired during the SWIM-2006 experiment.
